# Supplementary material
Source: Research Square preprint supplement (doi:10.21203/rs.3.rs-9194529/v1)
Supplement: Supplementary file 2 [file 332336d65ca0d15b7a6218f6.docx]

**Supporting Information**

**Broccoli Leaf** **Phenolics Ameliorate NAFLD via Regulation of EGFR/AKT/SREBP Signaling Pathways and Gut Microbiota**

Yaqi Zhao a,b, Wenyuan Zhang b, Yuanshou Zhao c, Yue Li d, Qian,Wang e, Zhanquan Zhang b, Haixia Yang e, Liwang Liu a,*, Jianjun Deng b,*

a National Key Laboratory of Crop Genetics and Germplasm Enhancement, Key Laboratory of Horticultural Crop Biology and Genetic Improvement (East China) of MOAR, College of Horticulture, Nanjing Agricultural University, Nanjing, China

b State Key Laboratory of Vegetable Biobreeding, Institute of Vegetables and Flowers, Chinese Academy of Agricultural Sciences, Beijing 100081, China

c Lanzhou Industry Research Institute, Lanzhou, Gansu 730050, China

d Haide College, Ocean University of China, Qingdao 266100, China

e College of Food Science and Nutritional Engineering, China Agricultural University, Beijing 100083, China

***Corresponding Author:**

Prof. Jianjun Deng, E-mail: [dengjianjun@nwu.edu.cn](mailto:dengjianjun@nwu.edu.cn)；

Prof. Liwang Liu, E-mail: nauliulw@njau.edu.cn.

**Table S1. The primers for qPCR.**

| **Mouse primers** | **Type** | **Primer sequence (5’–3’)** |
| --- | --- | --- |
| *IL-1β* | Forward | GCAACTGTTCCTGAACTCAACT |
| Reverse | ATCTTTTGGGGTCCGTCAACT |
| *TNF-α* | Forward | CCCTCACACTCAGATCATCTTCT |
| Reverse | GCTACGACGTGGGCTACAG |
| *IL-6* | Forward | CCAAGAGGTGAGTGCTTCCC |
| Reverse | CTGTTGTTCAGACTCTCTCCCT |
| *ZO-1* | Forward | CCGACGGCACGTCTCTC |
| Reverse | GTCTCCTCCAAAGCCTGCTC |
| *Claudin* | Forward | CCTGCCCCAGTGGAAGATTT |
| Reverse | AAACGCAGGACATCCACAGT |
| *Occludin* | Forward | TTGAAAGTCCACCTCCTTACAGA |
| Reverse | CCGGATAAAAAGAGTACGCTGG |
| *SREBP1c* | Forward | TGGACGAGCTGGCCTTCGGT |
| Reverse | GGCCAGCGGCAGGCTAGATG |
| *Cd36* | Forward | TCCTCTGACATTTGCAGGTCTATC |
| Reverse | AAAGGCATTGGCTGGAAGAA |
| *Scd1* | Forward | TTCCGCCACTCGCCTAC |
| Reverse | GTAAGAACTGGAGATCTCTTGGA |
| *FAS* | Forward | CATCCACTCAGGTTCAGGTG |
| Reverse | AGGTATGCTCGCTTCTCTGC |
| *Acaca* | Forward | GACAGACTGATCGCAGAGAAAG |
| Reverse | TGGAGAGCCCCACACACA |
| *Cpt1b* | Forward | TCGGTGAGCCTGGCCT |
| Reverse | TTGAGTGGTGACCGAGTCTG |
| *GAPDH* | Forward | AGGTCGGTGTGAACGGATTTG |
| Reverse | TGTAGACCATGTAGTTGAGGTCA |
