# Supplementary material
Source: Research Square preprint supplement (doi:10.21203/rs.3.rs-9194529/v1)

**There are uncropped Blots images of figure 7I:**

**
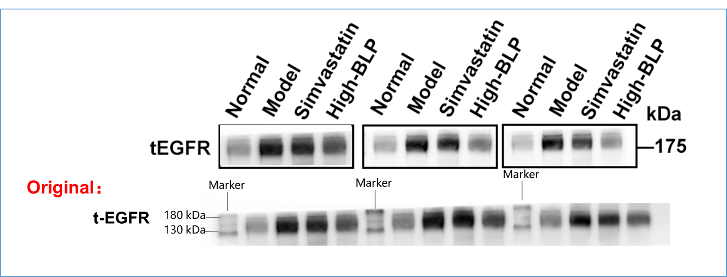

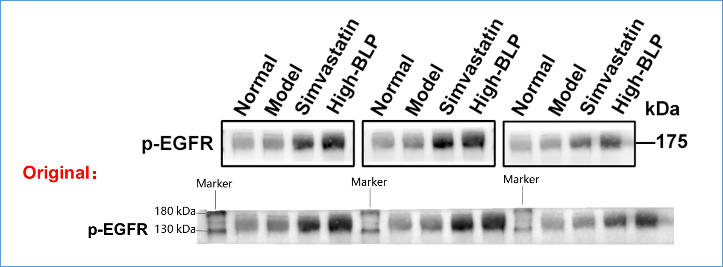
**

**
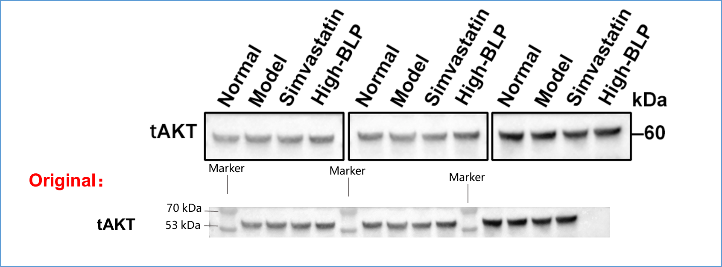

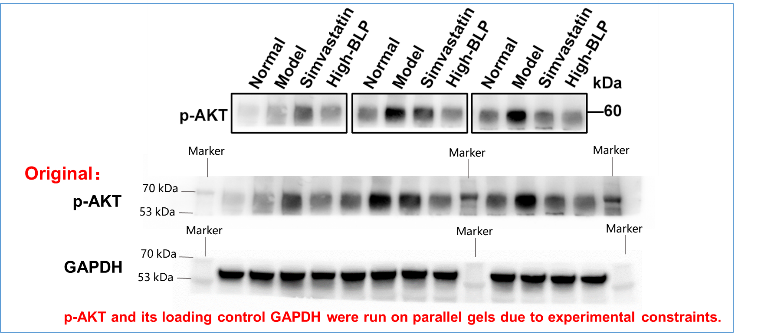
**

**
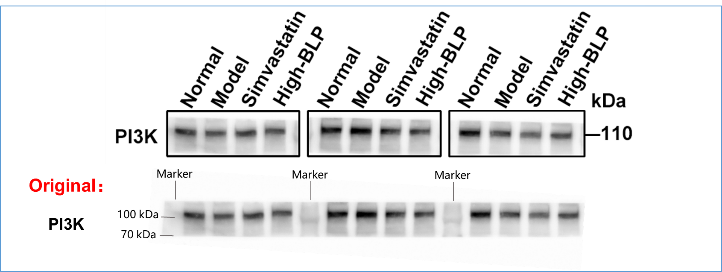

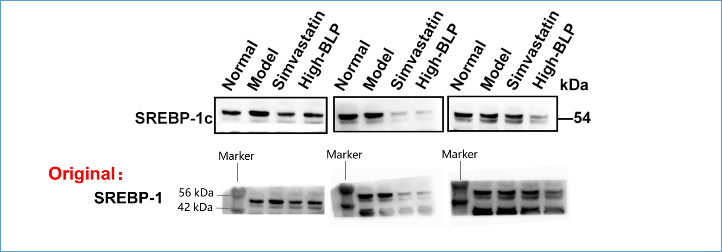
**

**
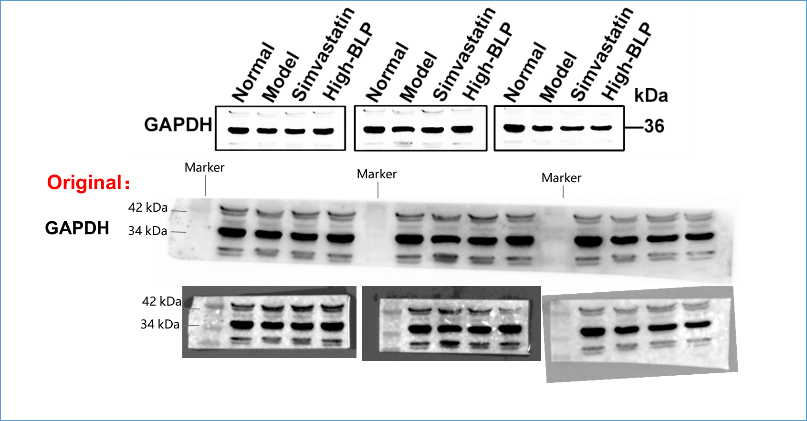
**

**There are uncropped Blots images of figure 7P:**

**
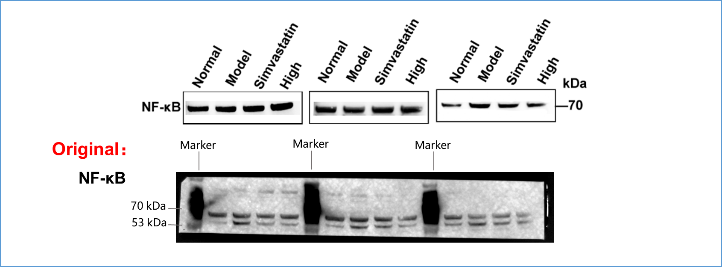

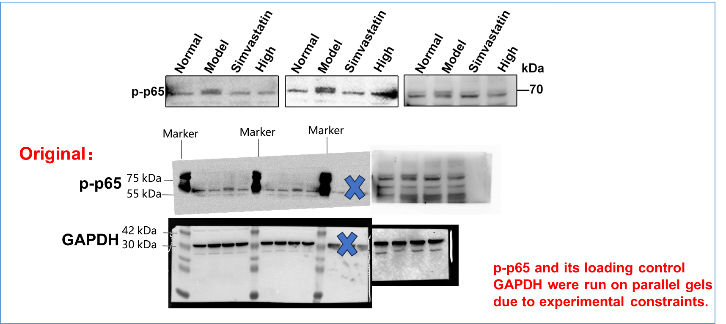
**

**
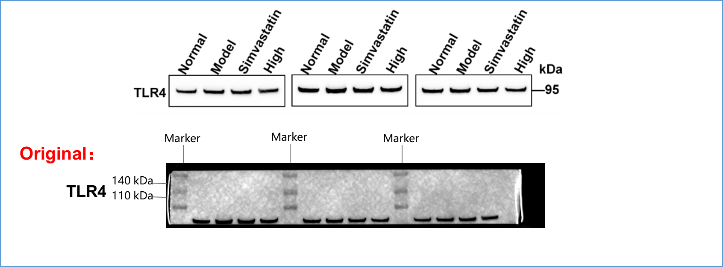

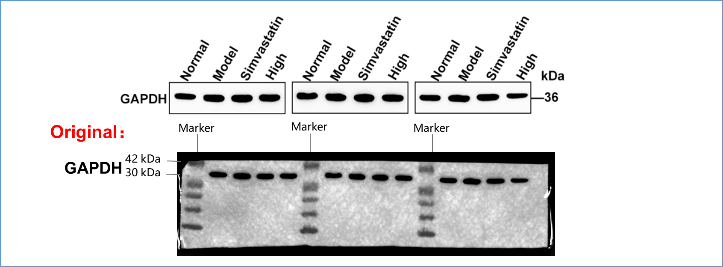
**

Supplement: Supplementary file 1 [file 06fba15b5e38ff13a8aafefb.docx]
